# Supplementary material for: Chemical fate and settling of mineral dust in surface seawater after atmospheric deposition observed from dust seeding experiments in large mesocosms
Source: Copernicus journal article supplement (doi:10.5194/bg-11-5581-2014), 2014-10-13
Supplement: Supplementary file 1 [file Desboeufs_sediment_traps_BG_supplement.xlsx]

## Sheet: mass in sediment traps (mg)
Samples	time (h)	Total mass (mg)	(+/-)	C	(+/-)	N	(+/-)	Al	(+/-)	Ba	(+/-)	Ca	(+/-)	Co	(+/-)	Cu	(+/-)	Fe	(+/-)	K	(+/-)	Li	(+/-)	Mg	(+/-)	Mn	(+/-)	Mo	(+/-)	Nd	(+/-)	P	(+/-)	S	(+/-)	Sr	(+/-)	Ti	(+/-)
Q1C	24	98.2613	54.3591	22.9184	9.38893	3.32965	1.0075	2.23459	1.64464	0.0121141	0.00930784	5.48893	3.49343	0.000569499	0.000423377	0.00173069	0.0012028	1.12954	0.848319	1.00481	0.772266	0.01937	0.00579318	1.15605	0.737923	0.0118109	0.00832595	0.00155918	0.000824969	0.00203547	0.00128239	0.511469	0.18002	0.574344	0.285952	0.054321	0.02908	0.147743	0.113589
Q2C	73	92.4527	51.2946	19.0195	10.753	2.27162	1.16224	1.68305	1.42427	0.00909219	0.00772641	4.10665	2.80042	0.000451112	0.000366199	0.00123315	0.000936384	0.842526	0.722114	0.784475	0.674107	0.0215187	0.00712801	0.807895	0.609552	0.00853366	0.00682646	0.00161562	0.00166786	0.00203571	0.00193498	0.467047	0.18924	0.417504	0.31885	0.04142	0.0262853	0.109731	0.094837
Q3C	120	111.661	14.7676	24.1752	4.62034	3.00176	0.658056	2.52597	0.452496	0.0132143	0.00263037	5.63304	0.580748	0.000612997	0.000136941	0.00217679	0.000837239	1.26043	0.243587	1.21652	0.169186	0.0302663	0.00222367	1.18803	0.102912	0.0122421	0.00189401	0.0021467	0.000396737	0.00234743	0.000433774	0.593661	0.324297	0.743575	0.17669	0.0574721	0.00988008	0.167672	0.0281367
Q4C	168	145.859	84.106	31.7695	18.6953	3.70458	2.23395	3.91581	2.76246	0.0208308	0.0151043	6.89031	4.41209	0.000997202	0.000693376	0.0034439	0.00263178	1.98078	1.41964	1.81343	1.24787	0.0324217	0.00969707	1.5666	1.02401	0.0191922	0.0139675	0.00352331	0.00254482	0.00319665	0.00209349	0.786266	0.586886	1.05687	0.730377	0.0641123	0.0396434	0.260881	0.187593
Total mass (mg)		448.234	164.677	97.8826	34.9547	12.3076	4.00171	10.3594	5.65542	0.0552513	0.0311411	22.1189	8.56787	0.00263081	0.00147346	0.00858453	0.00471395	5.21327	2.93464	4.81924	2.57193	0.103577	0.0240993	4.71857	2.14728	0.0517789	0.0281436	0.00884481	0.00473196	0.00961526	0.00499891	2.35844	1.10247	2.79229	1.26988	0.217325	0.0620675	0.686028	0.386079
Q1D	24	480.237	198.247	52.9524	18.9668	5.2979	2.2605	22.1997	14.3266	0.168622	0.112023	54.3911	33.5986	0.00644152	0.00431396	0.00919175	0.00607905	11.3595	7.353	12.4546	7.4753	0.0360023	0.00186333	8.71308	5.40106	0.145825	0.0954316	0.0290093	0.018259	0.021589	0.0172039	0.767359	0.22689	2.44879	1.18725	0.272385	0.152119	1.65831	1.06663
Q2D	73	781.197	27.8751	69.0376	3.18466	4.40947	0.433783	30.3537	8.7719	0.231562	0.0708224	73.7934	20.1932	0.00882929	0.00229724	0.0121689	0.00335296	15.2135	4.44348	16.6224	5.44577	0.0462343	0.00764304	9.53107	1.62292	0.180252	0.0542385	0.0364943	0.00878584	0.0219788	0.00169485	0.70922	0.142563	2.08321	0.583663	0.347116	0.107905	2.2739	0.654732
Q3D	120	702.95	260.175	66.7244	23.2061	4.68863	1.48386	24.7452	9.45359	0.175456	0.0679413	59.564	21.921	0.00708372	0.00279555	0.0112562	0.00424983	12.3855	4.73925	13.2176	5.3477	0.045965	0.00605948	7.72943	2.23411	0.140643	0.0539949	0.0298168	0.0112472	0.0207001	0.00929133	0.714388	0.219854	1.77173	0.571428	0.284873	0.0959381	1.82425	0.71706
Q4D	168	367.982	117.771	36.0928	11.168	2.76372	0.653002	13.1628	4.41116	0.0925396	0.0307123	31.0593	10.3773	0.00380215	0.00135502	0.00561177	0.00205284	6.59403	2.19353	6.89602	2.39967	0.0454097	0.00252815	4.30358	1.59698	0.0706759	0.0233432	0.0184557	0.00530781	0.0118095	0.00338308	0.555802	0.166216	1.05363	0.394982	0.148374	0.0528202	0.956708	0.325801
Total mass (mg)		2332.37	418.998	224.807	38.267	17.1597	3.79846	90.4613	30.3831	0.668181	0.233748	218.808	70.121	0.0261567	0.00848736	0.0382286	0.0137579	45.5525	15.411	49.1906	17.0524	0.173611	0.0150139	30.2772	8.80394	0.537396	0.191903	0.113776	0.0343478	0.0760775	0.0265328	2.74677	0.675859	7.35735	2.22127	1.05275	0.331621	6.71318	2.26794
Samples	time (h)	Total mass (mg)	(+/-)	C	(+/-)	N	(+/-)	Al	(+/-)	Ba	(+/-)	Ca	(+/-)	Co	(+/-)	Cu	(+/-)	Fe	(+/-)	K	(+/-)	Li	(+/-)	Mg	(+/-)	Mn	(+/-)	Mo	(+/-)	Nd	(+/-)	P	(+/-)	S	(+/-)	Sr	(+/-)	Ti	(+/-)
P1C	24	132.071	86.003	30.0248	18.7744	3.73138	2.20029	3.08022	2.15217	0.0218241	0.0171208	5.15356	3.18828	0.00175501	0.00122252	0.00962742	0.00780792	1.88509	1.28819	1.52553	0.974939	0.0198688	0.0131452	1.78093	1.31783	0.0300218	0.0195206	0.00471831	0.00328348	0.00901497	0.00622513	0.631001	0.344472	0.998047	0.712112	0.0658248	0.0409426	0.216063	0.151115
P2C	72	272.418	191.463	59.095	41.9453	6.85216	5.54976	8.99272	6.33141	0.0746936	0.054863	11.0829	7.2489	0.00682543	0.00509091	0.0058791	0.00446165	6.59676	4.88064	3.85434	3.12655	0.062241	0.0429744	3.16483	2.22138	0.0566659	0.0308635	0.0160185	0.0118228	0.0333743	0.0250878	0.893333	0.598392	0.95303	0.676203	0.0790206	0.0555689	0.906191	0.680469
P3C	120	139.631	122.478	33.7455	25.7449	3.24537	2.83375	2.43067	3.36223	0.015406	0.0211031	5.11145	6.04442	0.00129241	0.00177984	0.00314898	0.00396034	1.46447	2.02216	1.58098	1.70861	0.0142274	0.0199256	1.51371	1.45668	0.021912	0.0216342	0.00359587	0.005005	0.0083056	0.00997232	0.612294	0.545006	0.754537	0.95003	0.0531497	0.0682365	0.223787	0.259264
P4C	168	224.632	210.278	17.1542	16.546	1.60535	1.49899	1.20126	1.07206	0.00681565	0.00595123	2.7334	2.52466	0.000627861	0.000546439	0.00148576	0.0013018	0.716813	0.629469	0.757586	0.721397	0.00745447	0.00665592	0.844132	0.762787	0.0125137	0.013699	0.0016965	0.00148116	0.00418343	0.00363477	0.33698	0.29262	0.484305	0.436993	0.0267703	0.0231846	0.115568	0.101191
Total mass (mg)		768.752	327.382	140.019	12.8403	15.4343	2.76328	15.7049	3.21927	0.118739	0.033595	24.0813	1.19582	0.0105007	0.00337466	0.0201413	0.00460709	10.6631	2.98869	7.71844	1.73999	0.103792	0.0238555	7.3036	0.52334	0.121113	0.00818456	0.0260291	0.00718996	0.0548783	0.0143821	2.47361	0.174844	3.18992	0.492228	0.224765	0.0229879	1.46161	0.388083
P1D	24	5051.31	1458.48	350.473	93.2753	12.5581	1.20517	234.23	77.9956	0.665368	0.0618281	747.264	260.16	0.0593772	0.00661657	0.150012	0.0538932	131.607	42.0826	83.9837	28.192	0.711108	0.0397857	83.6487	21.1688	1.81983	0.565823	0.160671	0.0233886	0.337466	0.0368765	2.94864	0.684132	29.3612	1.22464	1.71523	0.128127	18.3936	6.06415
P2D	72	9091.56	3007.84	633.175	219.216	22.106	7.16377	443.146	144.958	2.29863	0.812472	1340.38	431.769	0.218761	0.0755233	0.199216	0.0753833	244.763	79.1488	156.4	52.4828	2.04348	0.604604	135.825	29.1629	3.05128	1.04745	0.537677	0.186659	1.04306	0.393922	5.14775	1.30879	31.1326	12.1507	2.43708	0.799038	33.7239	11.8485
P3D	120	3543.52	1755.02	280.563	152.626	11.9146	6.40224	168.876	85.9203	0.865879	0.448366	498.838	254.087	0.0853667	0.0456419	0.0800172	0.0458768	92.1207	47.0658	58.9056	29.8618	0.828383	0.474586	55.4293	29.8307	1.05996	0.517313	0.212911	0.115378	0.390677	0.191715	2.19769	0.843717	12.6845	7.22842	0.967649	0.509584	12.5236	5.80064
P4D	168	787.632	228.695	106.937	21.7612	8.83358	0.997522	34.335	10.8446	0.164102	0.0453457	93.2695	25.7554	0.0162679	0.00493848	0.0178359	0.00535108	18.9732	5.62429	11.7838	3.70881	0.169087	0.0526225	13.2177	4.09337	0.191361	0.0569616	0.0418097	0.0121831	0.0819595	0.02298	1.33219	0.339353	4.22044	1.2229	0.220832	0.039114	2.54206	0.725736
Total mass (mg)		18474	1689.9	1371.15	149.044	55.4123	6.9207	880.587	77.6088	3.99398	0.842092	2679.75	220.392	0.379773	0.0791346	0.447081	0.102096	487.464	41.6705	311.074	27.7854	3.75205	0.681538	288.121	16.7523	6.12243	0.609772	0.953069	0.19871	1.85316	0.417014	11.6263	0.199695	77.3988	13.3901	5.34079	0.792333	67.1831	6.52363
Samples	time (h)	Total mass (mg)	(+/-)	C	(+/-)	N	(+/-)	Al	(+/-)	Ba	(+/-)	Ca	(+/-)	Co	(+/-)	Cu	(+/-)	Fe	(+/-)	K	(+/-)	Li	(+/-)	Mg	(+/-)	Mn	(+/-)	Mo	(+/-)	Nd	(+/-)	P	(+/-)	S	(+/-)	Sr	(+/-)	Ti	(+/-)
R3C	22	275.621	14.1938	45.5723	3.56331	3.72593	0.633898	6.83009	1.33646	0.0504444	0.00975215	16.7465	1.60326	0.00274724	0.000512661	0.40002	0.145355	3.94608	0.962321	6.82529	1.12856			2.83916	0.721351	0.0803166	0.0178664	0.000454223	0.000207601	0.0278456	0.00533739	0.236879	0.031995	1.80488	0.493933	0.111613	0.0130823	0.400587	0.0605733
R4C	46	284.681	114.985	55.7414	23.7729	5.61736	2.53322	7.09269	3.72231	0.0564041	0.023814	12.2019	5.64846	0.00199196	0.000431634	0.164492	0.103577	3.70636	2.16503	6.16212	3.75912			2.28537	1.21021	0.056365	0.008971	0.000251562	6.48946e-05	0.0226883	0.00580161	0.204507	0.039439	1.74132	0.959582	0.0976254	0.0552999	0.403091	0.177874
R5C	70	172.899	43.3789	34.5126	7.46808	3.5721	0.731205	3.86296	0.899858	0.0412892	0.00898497	5.3048	0.567795	0.00184451	0.00034598	0.379827	0.0441637	2.02311	0.442757	2.87506	0.754768			1.1679	0.257058	0.0468955	0.0126001	0.000189994	5.38872e-05	0.020627	0.00325929	0.195035	0.0362742	1.14215	0.30441	0.0511617	0.00903382	0.260518	0.0333079
R6C	94	167.51	74.9601	35.8098	15.7	4.04251	1.88562	3.37054	1.15259	0.0282264	0.00660081	4.1112	1.34129	0.00160955	0.000726662	0.324897	0.290776	1.81354	0.66814	2.35256	0.893602	0.000937722	0.00162418	1.03093	0.296867	0.0395968	0.0201677	0.000207556	0.000111898	0.0165355	0.00692385	0.217015	0.110571	1.02458	0.383418	0.0584727	0.026896	0.220062	0.0732368
R7C	118	89.12	18.9945	18.1035	4.00309	2.06146	0.621792	1.28494	0.169892	0.0119698	0.00130746	2.54038	0.275505	0.000804886	0.000140734	0.274931	0.0402534	0.663516	0.0888054	0.831026	0.122432	0	0	0.415451	0.0653894	0.0213636	0.00357872	0.000117837	4.29363e-05	0.00861217	0.000950515	0.116596	0.0312318	0.505698	0.0810361	0.0261161	0.00402008	0.0928093	0.0108546
R8C	142	37.9927	14.5572	7.05332	3.37574	0.805552	0.389886	0.220825	0.068966	0.00829861	0.00182536	0.425316	0.107431	0.000317982	0.000167111	0.0508574	0.0102863	0.111623	0.0318584	0.111569	0.027922	0	0	0.0722932	0.0172559	0.00799846	0.00329928	3.45551e-05	1.17907e-05	0.00345662	0.00179822	0.0494949	0.0221104	0.079035	0.0181533	0.00470424	0.00115734	0.0169719	0.00535223
R9C	166	68.162	20.801	14.0752	3.45168	1.70239	0.413946	1.94149	0.746328	0.0120345	0.00467769	5.40605	3.02079	0.000516853	0.000159098	0.00237911	0.0012715	1.03376	0.423748	1.46981	0.712343	0.00179555	0.000668562	0.915012	0.439045	0.0137918	0.00459608	7.73467e-05	3.36955e-05	0.00550215	0.00147241	0.105805	0.0292727	0.633048	0.326972	0.0415134	0.0218372	0.112748	0.0466278
Total mass (mg)		1095.99	110.742	210.868	22.587	21.5273	2.74011	24.6035	1.48043	0.208667	0.0132165	46.7362	2.76045	0.00983298	0.000967291	1.5974	0.320435	13.298	0.765995	20.6274	0.971709	0.00273327	0	8.72611	0.490885	0.266328	0.0253848	0.00133307	0.000104275	0.105267	0.00965571	1.12533	0.152339	6.93071	0.599211	0.391206	0.0306719	1.50679	0.105343
R3D	22	3890.47	599.185	304.767	37.3996	12.752	2.1601	137.329	29.3083	1.09759	0.242979	495.858	77.0646	0.0796233	0.0114349	0.225196	0.224486	92.081	22.4677	83.0784	20.0248	0.135665	0.030906	76.641	17.2965	1.55612	0.241559	0.0012646	0.000739435	0.681745	0.0893387	3.1094	0.437214	7.90098	1.87864	1.47335	0.393372	14.8678	2.91474
R4D	46	5423.75	955.896	385.393	62.2497	14.63	3.29527	199.343	40.3536	1.5349	0.323374	650.979	98.3644	0.111067	0.0188068	0.273845	0.219653	141.359	32.5978	126.966	29.9864	0.20993	0.0459863	113.507	24.9735	2.13521	0.377631	0.00215768	0.00212281	0.92924	0.16283	4.41248	0.827584	10.0566	2.23034	2.05841	0.527876	20.7639	4.11956
R5D	70	4192.62	1011.67	313.571	86.8271	14.0332	4.62731	182.178	50.8111	1.31913	0.317953	455.276	106.332	0.0857083	0.0208007	0.127254	0.0361751	127.531	38.0875	116.515	29.4044	0.189083	0.0434392	99.097	28.835	1.57588	0.366533	0.000987058	0.00110296	0.724342	0.186662	3.60985	1.02296	10.0404	2.61207	1.75521	0.505318	18.9194	5.42308
R6D	94	3783.7	483.172	301.685	39.1044	16.9404	3.82042	164.58	21.431	1.1838	0.151464	557.17	176.778	0.0769419	0.0107367	0.107477	0.0207505	120.117	17.4829	104.254	16.9525	0.17665	0.02551	89.3082	11.183	1.39652	0.147095	0.0014324	0.00114984	0.652305	0.092577	3.32094	0.448931	10.1442	1.90365	1.59846	0.301475	16.9118	2.60972
R7D	118	1344.96	512.739	112.232	40.0043	6.93141	1.70378	59.1108	20.0338	0.444601	0.18248	252.935	201.094	0.0271496	0.010946	0.0490399	0.0153069	41.3117	12.7729	36.9299	13.6087	0.0663233	0.0271062	31.5482	9.79216	0.501457	0.182505	0.000467612	0.000556489	0.238207	0.0946826	1.16736	0.400868	4.20707	1.75737	0.54117	0.180362	6.19074	2.38376
R8D	142	533.447	98.1376	46.6311	9.23863	3.07669	0.751357	19.399	6.70045	0.137174	0.0495514	111.501	97.2034	0.0106646	0.00200449	0.0125737	0.00531919	13.9495	5.3036	12.1727	4.99555	0.0205623	0.00722353	10.8493	4.23054	0.192757	0.0393455	0.000158938	7.4268e-05	0.0933686	0.0136442	0.47629	0.102846	1.38977	0.693956	0.177444	0.0759469	2.02909	0.733736
R9D	166	499.771	227.542	51.2002	22.5418	4.1988	1.61771	19.5224	8.09108	0.13381	0.0598624	49.0374	8.24838	0.00978367	0.00482627	0.0108425	0.00535782	13.8896	5.8943	11.5379	4.79266	0.0198969	0.00875294	10.738	4.45722	0.173874	0.0807139	0.000243913	0.000243598	0.0851502	0.0407496	0.495191	0.180947	1.60762	0.624777	0.18439	0.0772375	1.98168	0.908891
Total mass (mg)		19668.7	2757.43	1515.48	229.493	72.5626	14.8122	781.462	117.907	5.85101	0.843593	2572.76	628.052	0.400939	0.0592962	0.806227	0.304586	550.239	88.3461	491.455	81.1934	0.81811	0.126608	431.689	65.1188	7.53182	0.967706	0.0067122	0.00392376	3.40436	0.511365	16.5915	2.49555	45.3466	8.74796	7.78843	1.29104	81.6645	13.0267
Samples	time (h)	Total mass (mg)	(+/-)	C	(+/-)	N	(+/-)	Al	(+/-)	Ba	(+/-)	Ca	(+/-)	Co	(+/-)	Cu	(+/-)	Fe	(+/-)	K	(+/-)	Li	(+/-)	Mg	(+/-)	Mn	(+/-)	Mo	(+/-)	Nd	(+/-)	P	(+/-)	S	(+/-)	Sr	(+/-)	Ti	(+/-)
R11C	24	76.0107	10.7495	16.9313	2.1786	2.05116	0.249017	2.35365	0.256918	0.0136977	0.00129864	5.9313	1.64069	0.000590814	7.26104e-05	0.00395721	0.00205288	1.27174	0.190595	1.55251	0.399417	0.00206617	0.000255109	0.93893	0.158188	0.0153954	0.00287569	7.78627e-05	5.57055e-06	0.00639734	0.000568687	0.129216	0.00923821	0.667308	0.136703	0.0451012	0.0106658	0.136003	0.0109958
R12C	48	49.903	15.1816	11.192	2.709	1.36653	0.274945	0.964202	0.506077	0.00529389	0.00280483	4.2163	3.80811	0.00040191	0.000151341	0.00127371	0.000860676	0.51116	0.31272	0.65735	0.470721	0.000913125	0.000477657	0.577851	0.44347	0.00856996	0.00128407	6.63037e-05	6.00352e-05	0.0036477	0.000502465	0.0933727	0.0366422	0.37021	0.25181	0.0302263	0.0278656	0.0600099	0.0366849
R13C	72	57.76	6.80237	12.1914	3.23077	1.35787	0.311943	1.21216	0.0376596	0.00655639	0.000235484	7.72065	2.46041	0.000360811	1.95839e-05	0.0023394	0.000757655	0.718428	0.0995078	0.796553	0.2302	0.00117521	1.83472e-05	0.759388	0.181165	0.010738	0.0010235	4.44847e-05	1.38316e-06	0.00372303	0.000516868	0.104085	0.0466032	0.439648	0.112464	0.0581394	0.0186608	0.0701388	0.00354822
R14C	96	23.027	23.027	4.01136	4.01136	0.560291	0.560291	0.302758	0.302758	0.00164767	0.00164767	3.02154	3.02154	8.73245e-05	8.73245e-05	0.000937506	0.000937506	0.176843	0.176843	0.343011	0.343011	0.000444037	0.000444037	0.489905	0.489905	0.00222278	0.00222278	6.86393e-06	6.86393e-06	0.000760558	0.000760558	0.0638087	0.0638087	0.327969	0.327969	0.0227457	0.0227457	0.0183108	0.0183108
R15C	120	19.431	19.431	3.42098	3.42098	0.429272	0.429272	0.305192	0.305192	0.00176484	0.00176484	1.79624	1.79624	9.74001e-05	9.74001e-05	0.000386144	0.000386144	0.184354	0.184354	0.292879	0.292879	0.000361688	0.000361688	0.331731	0.331731	0.00246895	0.00246895	2.8825e-06	2.8825e-06	0.000886996	0.000886996	0.0358798	0.0358798	0.231284	0.231284	0.0147927	0.0147927	0.0170115	0.0170115
R16C	144	18.5685	18.5685	4.02693	4.02693	0.555916	0.555916	0.188232	0.188232	0.00098543	0.00098543	1.87385	1.87385	6.59397e-05	6.59397e-05	0.000198413	0.000198413	0.0970737	0.0970737	0.174166	0.174166	0.000245758	0.000245758	0.267601	0.267601	0.00168436	0.00168436	4.78455e-06	4.78455e-06	0.000616105	0.000616105	0.0529388	0.0529388	0.189236	0.189236	0.0140759	0.0140759	0.0111495	0.0111495
Total mass (mg)		244.7	23.9877	51.774	5.61807	6.32104	0.642877	5.32619	0.828356	0.0299459	0.0048162	24.5599	2.36229	0.0016042	0.000216023	0.00909238	0.00141728	2.9596	0.449346	3.81647	0.506574	0.00520599	0.00068634	3.36541	0.255411	0.0410795	0.00562828	0.000203182	3.35723e-05	0.0160317	0.00232385	0.479301	0.0349917	2.22565	0.171419	0.185081	0.0176243	0.312623	0.0479114
R11D	24	4460.59	516.856	323.194	30.9476	14.925	2.63783	160.544	54.2834	1.37441	0.536282	566.305	148.461	0.0889243	0.0117683	0.0928868	0.0452772	118.011	46.3945	103.7	42.1794	0.173048	0.066821	98.315	37.7119	1.70361	0.217074	0.000886813	0.000493445	0.782285	0.116732	3.55298	0.364734	8.64851	3.06163	1.73499	0.641935	18.5903	7.14854
R12D	48	2835.94	520.491	200.127	41.8301	12.2709	2.83769	118.724	20.5727	0.94718	0.155278	386.397	70.3737	0.0591746	0.0112152	0.0677784	0.0152197	88.1191	14.754	77.8795	13.2898	0.131577	0.0227394	70.5058	11.8439	1.10352	0.192714	0.000636324	0.000614179	0.502145	0.0981532	2.35611	0.447627	6.2062	1.15531	1.17523	0.199905	13.1233	2.29888
R13D	72	3456.02	1347.92	248.565	97.4904	12.5709	3.53567	144.557	67.1918	1.14964	0.537538	495.565	230.431	0.0672191	0.0329318	0.0851297	0.0371679	107.159	48.7954	95.9109	41.9071	0.164223	0.0749894	85.4075	37.3239	1.26722	0.630352	0.000747369	0.000562681	0.573622	0.285016	2.7539	1.29281	8.43399	3.03697	1.45953	0.619329	15.7727	7.25071
R14D	96	677.175	254.161	53.6807	18.4806	3.01734	0.905552	23.9117	11.2096	0.175491	0.0902354	87.4174	37.8529	0.0135194	0.00533237	0.0122849	0.00432379	16.5725	8.0872	14.1961	7.43846	0.025653	0.0130576	13.3584	6.38154	0.257671	0.0971953	0.000101159	4.26919e-05	0.117358	0.0439421	0.580117	0.213049	1.32798	0.641362	0.236369	0.118956	2.47177	1.21278
R15D	120	351.89	233.238	30.9771	21.7927	2.1247	1.72017	13.0576	9.01566	0.0981511	0.0701294	47.7248	31.2945	0.00672902	0.00449245	0.00803354	0.00561161	9.53984	6.71195	8.67175	6.34157	0.0144206	0.0103367	7.91285	5.34382	0.120095	0.0784543	0.000185594	0.000227871	0.0580205	0.0383756	0.306423	0.207221	1.0728	0.794109	0.14507	0.0983419	1.42765	0.997952
R16D	144	180.703	120.084	19.2396	12.1391	1.81259	1.09936	5.72655	4.02548	0.0382441	0.0280872	24.3622	16.1625	0.00307669	0.00226725	0.00316283	0.00223811	3.77571	2.7798	3.4196	2.43359	0.00586484	0.00419764	3.49688	2.31046	0.0578415	0.0422202	4.08399e-05	3.35821e-05	0.0272133	0.0198469	0.23639	0.114902	0.744807	0.369058	0.069289	0.038535	0.558837	0.403571
Total mass (mg)		11962.3	2117.44	875.782	150.963	46.7214	7.17935	466.521	98.3495	3.78312	0.905435	1607.77	259.712	0.238643	0.051745	0.269276	0.083443	343.177	80.7614	303.778	68.3716	0.514787	0.116425	278.996	63.0534	4.50996	0.940315	0.0025981	0.00166802	2.06064	0.458299	9.78592	1.83875	26.4343	3.94404	4.82048	1.04081	51.9446	12.2156
