# Supplementary material for: Chemical fate and settling of mineral dust in surface seawater after atmospheric deposition observed from dust seeding experiments in large mesocosms
Source: Copernicus journal article supplement (doi:10.5194/bg-11-5581-2014), 2014-10-13
Supplement: Supplementary file 1 [file supplement-cover-letter.pdf › supplement-cover-letter.pdf]

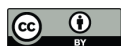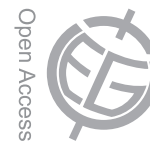

## *Supplement of*

# **Chemical fate and settling of mineral dust in surface seawater after atmospheric deposition observed from dust seeding experiments in large mesocosms**

**K. Desboeufs et al.**

*Correspondence to:* K. Desboeufs ([desboeufs@lisa.u-pec.fr](mailto:desboeufs@lisa.u-pec.fr))

- Supplement-Cover-Letter.pdf
- Desboeufs\_sediment\_traps\_BG\_supplement.xlsx
- Desboeufs\_water\_column\_BG\_supplement.xlsx
