# Supplementary material for: Chemical fate and settling of mineral dust in surface seawater after atmospheric deposition observed from dust seeding experiments in large mesocosms
Source: Copernicus journal article supplement (doi:10.5194/bg-11-5581-2014), 2014-10-13
Supplement: Supplementary file 2 [file Desboeufs_water_column_BG_supplement.xlsx]

## Sheet: Exp Q
Elemental particulate concentrations (µg/L) in the water column
SAMPLING	MESOCOSM	DEPTH (m)	TIME (h)	pAl	(+/-)	pFe	(+/-)
Q1	C1	-5	-2	0.8607	0.126236	0.193453	0.082748
Q1	C2	-5	-2	0.857039	0.209727	0.447429	0.0519784
Q1	C3	-5	-2	0.521585	0.255024	0.617089	0.0601128
Q1	D1	-5	-2	0.487709	0.37061	0.399152	0.0893328
Q1	D2	-5	-2	0.549276	0.182287	0.284468	0.0295764
Q1	D3	-5	-2	0.91807	0.142355	0.4767	0.101941
Q2	C2	-5	6	NA		0.211432	0.0205224
Q2	D1	0	6	65.411	0.620884	34.7932	1.01873
Q2	D1	-5	6	9.0679	0.654106	5.38752	0.119639
Q2	D1	-10	6	1.04173	0.0571834	1.1933	0.042043
Q2	D2	0	6	65.6764	3.19032	36.094	1.6632
Q2	D2	-5	6	4.1111	0.471468	2.28661	0.0576912
Q2	D3	0	6	84.2517	3.73025	48.9274	1.43657
Q2	D3	-5	6	1.6198	0.518833	1.15675	0.0952476
Q3	C1	-5	22	0.485616	0.179992	0.451965	0.098452
Q3	C2	-5	22	NA		0.446515	0.0116122
Q3	C3	-5	22	0.52151	0.072432	0.489692	0.0609636
Q3	D1	0	22	3.83937	0.162864	2.69708	0.0645424
Q3	D1	-5	22	7.03663	0.78553	4.04047	0.133733
Q3	D1	-10	22	3.23566	0.183366	2.05207	0.229658
Q3	D2	0	22	0.567838	0.326115	NA
Q3	D2	-5	22	5.11066	0.551702	3.49025	0.165329
Q3	D2	-10	22	3.02324	0.577866	1.56849	0.0832416
Q3	D3	0	22	8.99296	0.903584	5.71945	0.0906
Q3	D3	-5	22	7.7155	0.438504	4.73493	0.117176
Q4	C1	-5	46	NA		0.271728	0.0532224
Q4	C2	-5	46	0.603803	0.208707	0.375363	0.106163
Q4	C3	-5	46	NA		0.460109	0.063294
Q4	D1	-10	46	1.8819	0.384331	1.30678	0.0237346
Q4	D1	-5	46	2.39673	0.3876	1.57891	0.0940368
Q4	D1	0	46	1.4899	0.305822	1.02983	0.0449987
Q4	D2	-10	46	1.30841	0.151202	0.864014	0.00143974
Q4	D2	-5	46	0.928325	0.203882	0.927894	0.0536848
Q4	D2	0	46	1.78553	0.104146	1.21802	0.176988
Q4	D3	-5	46	2.40559	0.164346	1.49674	0.111972
Q4	D3	0	46	2.71622	0.287947	1.33509	0.0407825
Q5	C1	-5	70	0.407283	0.461427	NA
Q5	C2	-5	70	0.617267	0.33576	0.158709	0.0837892
Q5	C3	-5	70	NA		0.112746	0.19565
Q5	D1	0	70	NA		0.703366	0.109252
Q5	D1	-5	70	1.80961	0.230117	3.43325	0.20843
Q5	D1	-10	70	0.894591	0.152002	1.0702	0.099132
Q5	D2	0	70	0.289607	0.151099	0.314961	0.0455696
Q5	D2	-5	70	1.18293	0.499058	0.926048	0.097524
Q5	D2	-10	70	1.5658	0.511098	0.741234	0.0462938
Q5	D3	0	70	1.34209	0.321932	0.912213	0.015704
Q5	D3	-10	70	0.973648	0.376292	0.803493	0.050736
Q7	C1	-5	118	NA		0.213102	0.0500656
Q7	C2	-5	118	NA		0.185958	0.0711776
Q7	D1	-5	118	0.642761	0.272285	0.412816	0.146986
Q7	D2	-5	118	NA		0.363781	0.0302
Q7	D3	-5	118	0.268246	0.0651024	0.511347	0.06028
Q9	C1	-5	166	0.241723	0.0855976	0.239484	0.0644996
Q9	C2	-5	166	0.6644	0.070668	0.130033	0.17818
Q9	C3	-5	166	0.616488	0.0268958	0.31023	0.0469014
Q9	D1	-5	166	NA		0.304991	0.137562
Q9	D3	-5	166	NA		0.288248	0.0919904

## Sheet: Exp P
Elemental particulate concentrations (µg/L) in the water column
SAMPLING	MESOCOSM	DEPTH (m)	TIME (h)	pAl	(+/-)	pFe	(+/-)
P1	C1	-5	-17	1.00588	0.0788096	0.479045	0.0517376
P1	C2	-5	-17	1.21101	0.219082	0.932181	0.0689928
P1	C3	-5	-17	2.6072	0.209399	1.60698	0.0580992
P1	D1	0	-17	0.758606	0.0691296	0.390695	0.124312
P1	D1	-5	-17	0.39732	0.082173	0.381539	0.0215817
P1	D1	-10	-17	1.93423	0.223944	1.40885	0.078862
P1	D2	-5	-17	0.808013	0.123984	0.736819	0.0961632
P1	D2	-10	-17	1.42329	0.0923508	0.872374	0.106234
P1	D3	-5	-17	0.642834	0.0682068	0.595322	0.199792
P2	C1	-5	6	0.614642	0.125216	0.470334	0.0551432
P2	C2	-5	6	0.469912	0.12382	0.462837	0.0604
P2	C3	-5	6	NA		0.367161	0.0078468
P2	D1	0	6	70.4077	1.56312	35.4373	0.24048
P2	D1	-5	6	13.8993	0.5988	6.31392	0.11976
P2	D1	-10	6	1.45493	0.064584	0.748269	0.0129766
P2	D2	0	6	41.5826	0.42056	16.3083	0.66088
P2	D2	-5	6	37.4516	0.4816	17.1235	0.4214
P2	D2	-10	6	5.73442	0.140494	3.4915	0.0948632
P2	D3	0	6	83.6986	0.72096	34.5125	0.24032
P2	D3	-5	6	16.7472	0.48	8.78657	0.12
P3	C1	-5	24	0.862263	0.11954	0.643988	0.101336
P3	C2	-5	24	0.76659	0.105141	0.29681	0.035148
P3	C3	-5	24	1.2569	0.468758	0.794391	0.078936
P3	D1	0	24	5.68835	0.263698	2.85043	0.0247901
P3	D1	-5	24	12.9667	0.132195	8.19446	0.211634
P3	D1	-10	24	5.87056	0.207995	3.37721	0.0806512
P3	D2	0	24	14.0844	0.102547	8.25034	0.154431
P3	D2	-5	24	3.2339	0.319757	1.55535	0.021196
P3	D2	-10	24	4.52814	0.125798	2.4478	0.0919296
P3	D3	0	24	16.0305	0.160378	7.99	0.177324
P3	D3	-5	24	12.91	0.148682	7.32187	0.0360827
P4	C1	-5	48	0.907814	0.0923508	0.549448	0.0682068
P4	C2	-5	48	0.988897	0.355858	0.942469	0.057494
P4	C3	-5	48	0.836386	0.0381276	0.598111	0.0320756
P4	D1	0	48	4.77309	0.205705	2.45953	0.0545513
P4	D1	-5	48	2.34818	0.265078	1.15308	0.0490212
P4	D1	-10	48	4.55039	0.224516	2.41342	0.147452
P4	D2	0	48	1.82166	0.251098	1.03595	0.0265584
P4	D2	-5	48	6.5772	0.201398	3.54853	0.0713664
P4	D2	-10	48	0.906595	0.163296	0.619488	0.03024
P4	D3	0	48	5.04465	0.255563	2.59941	0.0841784
P4	D3	-5	48	1.54238	0.108576	1.35677	0.100734
P5	C1	-5	96	0.655774	0.27198	0.562265	0.07555
P5	C2	-5	96	0.960863	0.520216	0.697009	0.0596772
P5	C3	-5	96	1.95592	0.177811	0.648518	0.0417312
P5	D1	0	96	2.12165	0.217296	1.18504	0.030844
P5	D1	-5	96	1.39975	0.161161	1.24057	0.0356124
P5	D1	-10	96	2.85744	0.149693	1.33292	0.102008
P5	D2	0	96	1.42604	0.247036	0.878389	0.02718
P5	D2	-5	96	2.34507	0.137199	1.22348	0.0259892
P5	D2	-10	96	3.63966	0.150189	2.43347	0.0429976
P5	D3	0	96	1.62274	0.196513	1.07436	0.0319484
P5	D3	-10	96	4.18825	0.224844	2.44754	0.069322
P6	C1	-5	120	0.671519	0.18506	0.525814	0.0319484
P6	C2	-5	120	0.883102	0.0252573	0.493865	0.0807752
P6	C3	-5	120	0.838303	0.0169232	0.406329	0.0562092
P6	D1	0	120	2.0453	0.216405	1.31066	0.0198924
P6	D1	-5	120	1.10011	0.209774	0.799485	0.0506352
P6	D1	-10	120	1.80476	0.155125	1.02629	0.0253512
P6	D2	0	120	2.01744	0.193973	0.901965	0.10542
P6	D2	-5	120	2.07389	0.28595	1.42691	0.048762
P6	D2	-10	120	2.44016	0.16006	1.31629	0.06342
P6	D3	0	120	2.15275	0.558656	1.1518	0.052374
P6	D3	-10	120	0.95432	0.348508	0.637393	0.055568
P8	C1	-5	168	0.828028	0.278628	0.781057	0.0531872
P8	C2	-5	168	NA		0.294321	0.05436
P8	C3	-5	168	0.29253	0.232694	0.503033	0.0417036
P8	D2	-5	168	0.674033	0.281604	0.459823	0.0387584
P8	D3	-5	168	1.0569	0.210656	1.04742	0.121927

## Sheet: Exp R1
Elemental particulate concentrations (µg/L) in the water column
SAMPLING	MESOCOSM	DEPTH (m)	TIME (h)	pAl	(+/-)	pBa	(+/-)	pFe	(+/-)	pMn	(+/-)	pP	(+/-)	pTi	(+/-)
R1	C1	-5	-2	1.01993	0.0170256	0.0101206	0.000672575	0.644812	0.00844475	0.00989465	0.00049485	0.676464	0.0377594	0.0782813	0.0030434
R1	C2	-5	-2	1.25963	0.0332112	0.00851608	0.00094205	0.596812	0.0222268	0.00769295	0.00064045	0.582164	0.026223	0.111631	0.004135
R1	D1	0	-2	1.04823	0.0171476	0.00866438	0.000924475	0.434962	0.031296	0.0085359	0.00104905	0.612614	0.0375655	0.0795313	0.0012871
R1	D1	-10	-2	1.12293	0.0314769	0.0132436	0.000690125	0.640162	0.00775875	0.0082947	0.00049005	0.726564	0.0202256	0.100131	0.00397275
R1	D2	-5	-2	1.19693	0.0915	0.00833078	0.000786225	0.467112	0.0238449	0.0073211	0.00091515	0.586914	0.0326938	0.0753313	0.00799465
R1	D3	0	-2	0.194284	0.0189398	NA		0.355212	0.026612	NA		0.135614	0.0143809	0.0322472	0.0042973
R1	D3	-5	-2	0.999084	0.0181319	0.00854328	0.0013273	0.457012	0.0190356	0.00638875	0.00112765	0.640464	0.016125	0.0970813	0.0046315
R2	D1	0	10	25.3794	0.8023	0.126554	0.0145248	12.6455	0.56485	0.199984	0.00282845	1.48006	0.07155	1.47423	0.0441474
R2	D1	-2.5	10	18.6372	0.49835	0.0974036	0.00600683	11.0366	0.5021	0.161234	0.0055126	0.947214	0.0450883	1.23108	0.0559
R2	D1	-10	10	5.52933	0.08475	0.0468536	0.00159705	2.95821	0.0589	0.0445139	0.0019261	0.808714	0.0205851	0.410081	0.00951425
R2	D2	0	10	36.0614	2.9303	0.159879	0.0134758	18.8601	1.95385	0.281284	0.0235919	1.44416	0.10045	2.07058	0.17145
R2	D2	-2.5	10	13.5406	0.55395	0.0666036	0.00253133	7.33551	0.3286	0.105484	0.0020894	1.07486	0.0267276	0.873481	0.0415802
R2	D2	-5	10	9.71848	0.90345	0.0612536	0.00737243	5.50206	0.5886	0.0904343	0.0092728	0.857364	0.074	0.675481	0.07055
R2	D2	-10	10	3.49733	0.0863	0.0239623	0.00187003	1.91696	0.0552	0.028955	0.0003465	0.650464	0.00886285	0.279581	0.0106832
R3	C1	-5	22	0.882234	0.0327981	0.00673752	0.0021324	0.401412	0.06045	0.0062015	0.00291435	0.548464	0.0362441	0.0639813	0.00340685
R3	C3	-5	22	7.68278	0.3083	0.0495786	0.00146188	3.98846	0.16765	0.0514705	0.00110855	0.913814	0.0249749	0.547381	0.0218284
R3	D1	-5	22	9.59178	0.2851	0.0480786	0.0015796	5.14051	0.2277	0.0688675	0.0012005	0.644564	0.00405265	0.608781	0.0255085
R3	D1	-10	22	3.54208	0.1592	0.020988	0.00208898	1.80526	0.1037	0.025691	0.00217685	0.818114	0.0107102	0.240781	0.0149168
R3	D2	-5	22	17.9117	1.4075	0.0854286	0.01789	6.03401	0.52725	0.159634	0.0272637	1.30666	0.0636	0.966031	0.0324068
R3	D2	-10	22	4.22978	0.16565	0.0297286	0.00307938	2.19501	0.0827	0.0310468	0.00543215	0.600864	0.0208819	0.281981	0.0243308
R3	D3	0	22	16.0805	0.443	0.0757786	0.0038604	8.90161	0.1522	0.121984	0.00938265	1.02031	0.05745	0.969231	0.0182412
R3	D3	-10	22	4.03883	0.17095	0.0295286	0.0074917	2.18216	0.1167	0.0382978	0.0156298	0.761714	0.0324643	0.323281	0.0392388
R4	C1	-5	46	0.609084	0.0184041	0.00586608	0.000822425	0.279212	0.00845705	NA		0.457864	0.00598245	0.0555789	0.00326785
R4	C2	-5	46	0.434134	0.0152001	0.006463	0.0005081	0.205662	0.00559835	NA		0.494364	0.0120726	0.0361558	0.00173805
R4	D1	0	46	1.70568	0.1361	0.0277637	0.0183148	0.851562	0.08015	0.0417694	0.030914	0.757414	0.0411202	0.124781	0.0231133
R4	D1	-5	46	4.98013	0.05585	0.0368786	0.0211294	2.55151	0.0471787	0.0554009	0.0385194	0.697714	0.0139661	0.302581	0.0214827
R4	D1	-7.5	46	3.09693	0.15555	0.0345242	0.0245484	1.63751	0.12745	0.0346689	0.0207329	0.556414	0.0130094	0.235831	0.0719
R4	D1	-10	46	4.51383	0.066	0.026472	0.0032448	2.30566	0.0441999	0.0330167	0.0028633	0.648014	0.0037141	0.293431	0.0128847
R4	D1	-12.5	46	11.3286	0.45035	0.0698286	0.00209532	6.05411	0.331	0.0794843	0.0012824	1.04281	0.0248924	0.784581	0.0486694
R4	D2	0	46	2.00303	0.023021	0.0135987	0.00207255	1.05421	0.0168208	0.0169835	0.00148715	0.485314	0.00776355	0.122681	0.004744
R4	D2	-5	46	2.97248	0.077	0.0147436	0.000882925	1.40316	0.0408709	0.0184623	0.00080615	0.445014	0.0135711	0.180881	0.00525805
R4	D2	-7.5	46	3.03753	0.22805	0.0151728	0.000983575	1.61146	0.108	0.0207403	0.00059395	0.535914	0.02345	0.194631	0.0150699
R4	D2	-10	46	4.59823	0.191	0.0306036	0.00227108	2.39431	0.11435	0.0332474	0.00411665	0.579614	0.0219994	0.286831	0.0185515
R5	C1	-5	70	0.915784	0.0212382	0.00885145	0.0003593	0.425912	0.00764215	0.0062232	0.0006036	0.549614	0.0099415	0.0708313	0.0046677
R5	C2	-5	70	2.07568	0.0552	0.0133956	0.000674025	1.00136	0.0309763	0.0132981	0.0004435	0.664914	0.00304925	0.131831	0.00638675
R5	D1	-5	70	0.425434	0.00757885	0.00764077	0.0017255	0.242712	0.0885	NA		0.631214	0.022298	0.0413978	0.00089165
R5	D2	0	70	1.03453	0.0216114	0.0071558	0.00087085	0.553962	0.0081706	0.0071416	0.0002379	0.520664	0.011764	0.0875813	0.00061895
R5	D2	-5	70	2.16278	0.0543	0.0118157	0.00122513	1.04006	0.029894	0.0121138	0.00071515	0.643714	0.0307447	0.152131	0.0043688
R5	D2	-10	70	1.25653	0.0282507	0.00961192	0.0009014	0.637862	0.0090112	0.0111996	0.00086595	0.975464	0.0268656	0.0979313	0.0014817
R5	D3	-5	70	2.24978	0.13515	0.0231621	0.0025164	1.11746	0.08325	0.0125849	0.0010727	0.594914	0.0266523	0.152431	0.0122404
R6	D1	0	94	0.682934	0.0262228	0.00740388	0.00043915	0.360312	0.00933865	0.0071016	0.0005367	0.665814	0.0152744	0.0597112	0.00587165
R6	D1	-2.5	94	0.280484	0.023653	0.00781507	0.0004971	0.158212	0.0025745	NA		0.0450642	0.0162383	0.0422242	0.00375725
R6	D1	-10	94	0.690584	0.0274503	0.00590598	0.0011916	0.318762	0.0224105	0.0056788	0.00163425	0.474614	0.0315204	0.0621443	0.00383705
R6	D2	-2.5	94	0.873084	0.0314473	0.00697705	0.00100275	0.458412	0.00819675	0.0057324	0.0003839	0.482214	0.0111172	0.0583503	0.0025757
R6	D2	-5	94	0.706934	0.0230321	0.00624508	0.00049305	0.634862	0.00539935	0.0065372	0.00051195	0.456364	0.016762	0.0502285	0.00155885
R6	D2	-7.5	94	0.969784	0.0179581	0.00663983	0.000660375	0.528562	0.00627695	0.0068778	0.0002546	0.475764	0.0097184	0.0666813	0.00094955
R6	D2	-12.5	94	4.47853	0.09035	0.0241594	0.0019839	2.30826	0.06735	0.0259968	0.00124785	0.672214	0.0207168	0.257981	0.0085027
R8	C1	-5	142	2.44093	0.0101526	0.0594429	0.00124394	3.0092	0.00511084	0.0321947	0.00107639	2.9361	0.0237031	0.287328	0.00064472
R8	C2	-5	142	2.67933	0.00971538	0.0578429	0.00212313	4.7462	0.0319049	0.0821397	0.000299831	2.0463	0.0070795	0.216278	0.00366595
R8	C3	-5	142	3.56918	0.0319653	0.0762929	0.00474046	1.71715	0.0180626	0.0312004	0.00139927	2.2443	0.0339961	0.253478	0.0046868
R8	D1	0	142	3.68658	0.0274203	0.0893929	0.00232982	1.2807	0.0187019	0.0181858	0.000641301	2.1442	0.0119261	0.259178	0.00371384
R8	D1	-5	142	5.62763	0.0244846	0.0592929	0.00354135	2.5116	0.0371197	0.0470397	0.00106567	4.42605	0.0902274	0.419278	0.0049904
R8	D1	-10	142	5.51748	0.0202248	0.0508429	0.00271384	2.1988	0.0169327	0.0322552	0.00103786	3.02905	0.0467755	0.297478	0.00417473
R8	D1	-12.5	142	30.206	0.0584513	0.288543	0.00310866	14.0787	0.124175	0.19299	0.00111196	3.78015	0.0541582	1.73713	0.0130597
R8	D2	0	142	5.85133	0.0599596	0.0478429	0.00398506	1.8583	0.0261559	0.0535897	0.0026317	2.0136	0.0377285	0.713028	0.0107879
R8	D2	-5	142	5.49133	0.0419232	0.122293	0.00463187	3.391	0.0226423	0.0311924	0.00130595	2.1258	0.0187617	0.389878	0.00627121
R8	D2	-10	142	5.89113	0.0547338	0.200293	0.00454826	2.45375	0.0230987	0.0379815	0.00226312	1.93945	0.0365687	0.375928	0.00756163
R8	D2	-12.5	142	12.3706	0.0872889	0.107443	0.00336557	6.0823	0.051518	0.0759897	0.00274399	2.24575	0.0545483	0.728078	0.00435593
R8	D3	0	142	4.63018	0.011944	0.0451429	0.0060553	2.42035	0.0109137	0.041319	0.00243072	2.3444	0.0246894	0.322028	0.00865892
R8	D3	-5	142	4.58243	0.0279888	0.0435929	0.00617092	1.9071	0.0251784	0.0283431	0.00292396	2.89125	0.0593702	0.487878	0.00996071

## Sheet: Exp R2
Elemental particulate concentrations (µg/L) in the water column
SAMPLING	MESOCOSM	DEPTH (m)	TIME (h)	pAl	(+/-)	pBa	(+/-)	pFe	(+/-)	pMn	(+/-)	pP	(+/-)	pTi	(+/-)
R9	D1	0	5	762.144	5.22311	3.63924	0.00593025	398.039	3.92385	6.21414	0.0123594	6.9941	0.0872865	39.4668	0.174705
R9	D1	-5	5	291.002	4.30448	1.87429	0.00800518	157.119	0.768338	2.48459	0.0163847	2.8446	0.0416259	17.9343	0.180874
R9	D2	-2.5	5	48.7526	0.204007	0.451443	0.00696414	33.7117	0.091431	0.45034	0.00491402	1.2149	0.0424302	3.73733	0.0389713
R9	D2	-5	5	87.8495	0.471088	0.664993	0.00187476	48.2521	0.257425	0.74034	0.00308942	1.53815	0.0168461	7.75253	0.0483876
R9	D2	-10	5	9.89818	0.0447984	0.0654929	0.00186019	6.28065	0.0414819	0.0789897	0.00161214	1.15705	0.00970779	0.696628	0.00908656
R10	D1	-2.5	9	218.444	1.89175	1.29159	0.0108741	128.806	0.767033	2.05164	0.0120809	2.47375	0.0579029	12.607	0.109823
R10	D1	-5	9	71.6375	0.0979807	0.439943	0.00433115	36.6816	0.0571407	0.56634	0.00617414	1.9315	0.018243	4.52318	0.015302
R10	D1	-7.5	9	21.568	0.262992	0.182293	0.00948886	12.6814	0.0699188	0.20419	0.00309991	1.1254	0.047671	2.08818	0.0100965
R10	D1	-10	9	5.52578	0.0285185	0.0571929	0.0032824	3.51915	0.0203685	0.0540397	0.00323819	NA		0.602778	0.00222829
R10	D1	-12.5	9	8.27048	0.0323058	0.0681929	0.00245317	4.70855	0.0273642	0.0690897	0.00113695	1.0134	0.00772906	0.765778	0.00158186
R10	D2	0	9	575.254	1.5076	2.64569	0.0142359	301.999	0.600676	5.10404	0.0154243	5.23265	0.111997	29.2801	0.298742
R10	D2	-2.5	9	130.235	0.839536	0.729193	0.00109505	69.3264	0.523821	1.09759	0.00434702	1.4704	0.00925069	7.20803	0.0846248
R10	D2	-5	9	84.531	0.439855	0.554843	0.00225633	46.6394	0.529427	0.71319	0.00480851	1.91155	0.0081839	5.31013	0.0448568
R10	D2	-10	9	8.59253	0.0386245	0.110093	0.00735968	5.1563	0.0404483	0.0771897	0.00445257	0.920749	0.0329465	0.870728	0.00441092
R10	D2	-12.5	9	16.313	0.098006	0.132993	0.00819054	11.6006	0.12592	0.17134	0.00509313	1.34405	0.0514946	1.44698	0.0136113
R11	C2	-5	24	1.96438	0.0162813	0.0405929	0.00216217	NA		0.0172603	0.00189372	1.0533	0.0408033	0.173328	0.0045778
R11	C3	-5	24	3.59228	0.0193214	0.0379929	0.0067662	1.7364	0.0112906	0.0235834	0.0026216	NA		0.247978	0.0109124
R11	D1	0	24	77.394	0.728246	0.383943	0.0067602	40.6025	0.481445	0.62449	0.00258159	2.3316	0.0561633	4.09648	0.0408874
R11	D1	-2.5	24	97.897	0.122761	0.515193	0.00390767	55.6659	0.180037	0.84149	0.0052115	3.26285	0.0321929	5.29918	0.00182048
R11	D1	-5	24	22.0264	0.226507	0.186093	0.00469236	12.2242	0.126018	0.17949	0.00283265	2.93915	0.0199981	1.33918	0.00314911
R11	D1	-7.5	24	16.0391	0.008224	0.163093	0.00471645	8.8452	0.0592259	0.13469	0.000780381	3.3378	0.010365	1.00528	0.00226459
R11	D1	-10	24	10.216	0.0712872	0.640543	0.00403536	4.4457	0.0232854	0.0741397	0.000978979	2.6226	0.0218413	0.574928	0.00485764
R11	D1	-12.5	24	20.5341	0.159515	0.232943	0.0077036	12.4551	0.0981285	0.16939	0.00329957	3.7941	0.078538	1.47193	0.0111621
R11	D2	0	24	76.1145	0.33685	0.424843	0.00725798	43.6512	0.195355	0.66039	0.00705902	3.44165	0.1155	4.33208	0.0270521
R11	D2	-2.5	24	107.403	0.305162	0.573893	0.00755225	62.3214	0.662734	0.91819	0.00874034	4.93295	0.11662	6.14913	0.0348496
R11	D2	-5	24	28.4702	0.29066	0.183343	0.00528051	15.6431	0.1338	0.22694	0.00372111	2.7844	0.0747633	1.62938	0.0181017
R11	D2	-7.5	24	7.91163	0.0527298	0.127943	0.00885371	4.74325	0.014925	0.0738397	0.00507737	1.935	0.0633927	0.557828	0.0142163
R11	D2	-10	24	17.6658	0.146661	0.150243	0.00532526	10.1715	0.0721223	0.14774	0.00286731	3.4751	0.0451466	1.31643	0.0120887
R11	D2	-12.5	24	21.297	0.246797	0.197493	0.00350081	12.8194	0.0757054	0.18124	0.00406956	1.7653	0.0516521	1.51503	0.0156088
R12	D1	-5	48	15.8094	0.24607	0.130043	0.0173152	9.63725	0.0404728	0.15239	0.00960271	1.08415	0.0829806	0.932528	0.0214837
R12	D2	-5	48	32.1196	0.159671	0.373443	0.0028609	17.5832	0.377331	0.27619	0.00313982	2.8575	0.0538537	1.93228	0.016679
R12	D3	-5	48	25.4989	0.351687	0.205893	0.00575299	13.8361	0.0562378	0.21659	0.00237391	3.77445	0.0530612	1.42813	0.00954833
R12	D2	-10	48	20.2627	0.168045	0.119043	0.00375448	12.3614	0.0882996	0.16994	0.0024018	2.5138	0.0468305	1.22643	0.00983032
R13	C1	-5	72	2.07508	0.00518568	0.0617429	0.00500294	2.4584	0.0220383	0.0256381	0.00347407	4.03475	0.00462206	0.116428	0.00660915
R13	C2	-5	72	2.43938	0.0114461	0.0707429	0.00668657	1.7385	0.0252913	0.0285774	0.00260133	3.0201	0.0591042	0.764628	0.00922216
R13	C3	-5	72	2.42693	0.0107316	0.152193	0.00243649	1.0411	0.00132911	0.0209147	0.00178268	2.7739	0.0451299	0.167878	0.00294742
R13	D1	0	72	8.99388	0.0349876	0.110843	0.0105641	5.68935	0.0617961	0.0791897	0.0049439	3.1142	0.119717	0.601928	0.0136033
R13	D1	-5	72	16.3013	0.0412729	0.185643	0.00828206	10.3853	0.0445433	0.13504	0.00353023	3.46755	0.0782128	1.04268	0.0127416
R13	D1	-10	72	13.5061	0.138581	0.288143	0.0060135	7.02925	0.0741477	0.11034	0.00289896	2.95585	0.0325293	0.749978	0.00754204
R13	D1	-12.5	72	84.86	0.837154	0.652343	0.00407566	49.9689	0.450454	0.66654	0.00461185	3.7549	0.0645926	5.70848	0.0546269
R13	D2	0	72	12.4293	0.121458	0.132393	0.00477817	6.7524	0.0599879	0.10114	0.00126202	2.5826	0.0265466	0.863028	0.0132955
R13	D2	-5	72	10.2585	0.151605	0.112093	0.00639062	6.22815	0.0932249	0.0915897	0.00424848	3.7425	0.111316	0.658628	0.0141701
R13	D2	-10	72	13.2194	0.110885	0.133293	0.00519593	7.7313	0.143333	0.11289	0.00335038	3.7035	0.0572138	0.805778	0.0133066
R13	D2	-12.5	72	18.7668	0.0462389	0.236643	0.00767533	10.3089	0.0534371	0.14869	0.00545413	1.6664	0.0682616	1.22513	0.00970193
R13	D3	-5	72	56.518	0.148351	0.412193	0.00341901	32.1452	0.0625799	0.43584	0.00210393	3.4607	0.0576114	3.60273	0.0199885
R16	C2	-5	144	2.49903	0.0118311	0.0696429	0.00399039	NA		0.0222893	0.0019569	2.49785	0.0278307	0.223078	0.00431746
R16	C3	-5	144	3.04398	0.0238455	0.0876929	0.00950345	1.107	0.0241289	0.0198313	0.00455255	1.56455	0.0640967	0.162728	0.0132163
R16	D1	0	144	3.96118	0.0228531	0.0935929	0.00424385	1.69625	0.0215345	0.0343723	0.0021882	2.51835	0.0188073	0.335978	0.00782669
R16	D1	-5	144	5.78053	0.0178381	0.0855929	0.00262754	2.2634	0.0198785	0.0464397	0.00239153	2.7278	0.047664	0.297028	0.00482376
R16	D1	-12.5	144	5.38138	0.0411824	0.112943	0.00534308	2.5419	0.0314596	0.043053	0.000567928	3.55715	0.0706427	0.282728	0.00773216
R16	D2	0	144	6.68413	0.0333147	0.124843	0.00813793	3.3867	0.0321367	0.0561897	0.00447536	1.28245	0.0389032	0.469378	0.0121318
R16	D2	-5	144	5.83278	0.0246557	0.0893429	0.00508597	2.8835	0.0200641	0.0466397	0.00461908	2.12435	0.0690639	0.501578	0.00859862
R16	D2	-12.5	144	45.1378	0.346948	0.302743	0.00388858	25.0639	0.186664	0.32734	0.00346598	3.6258	0.0939804	2.77538	0.0233229
R16	D3	0	144	8.85953	0.0945918	0.152793	0.00901561	4.5158	0.0361404	0.0680397	0.00485227	2.2882	0.0616103	0.695028	0.0112486
R16	D3	-5	144	5.58628	0.0159111	0.0943429	0.00503644	2.9017	0.0199794	0.0475397	0.0027773	2.72595	0.050446	0.385028	0.00608699
R16	D3	-10	144	9.96983	0.0986388	0.153443	0.00606356	5.6842	0.0588331	0.0785897	0.00379092	2.888	0.0916929	0.593728	0.0103699
